# Supplementary material
Source: PubMed Central journal article supplement (PMC3347763)
Supplement: NIHMS361211-supplement-01.pdf [file NIHMS361211-supplement-01.pdf]

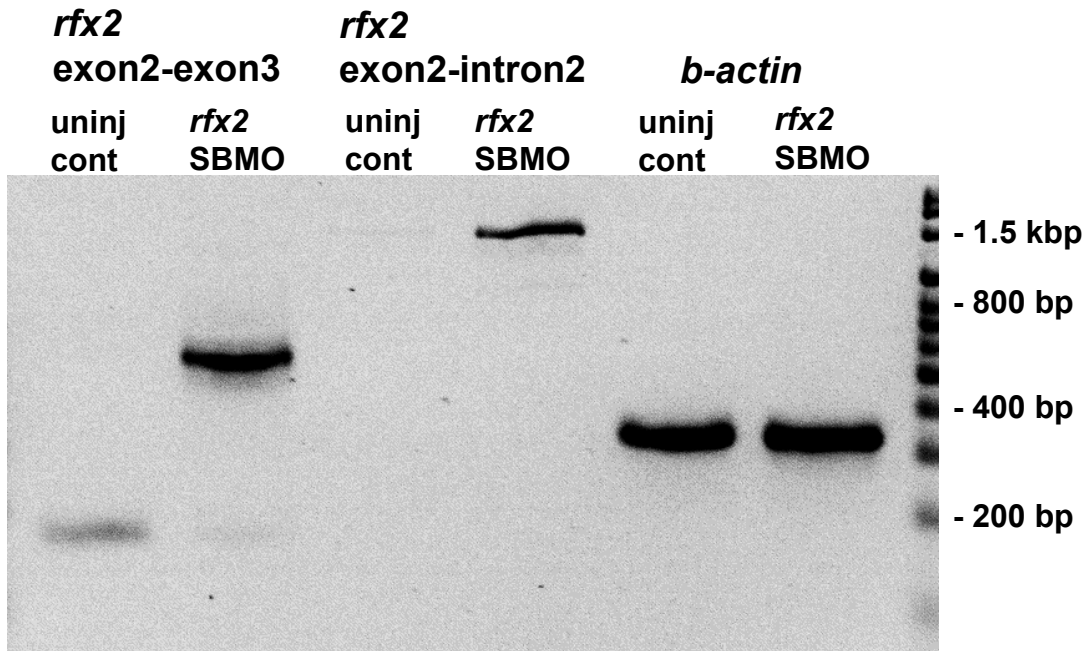

Supplemental Figure 1

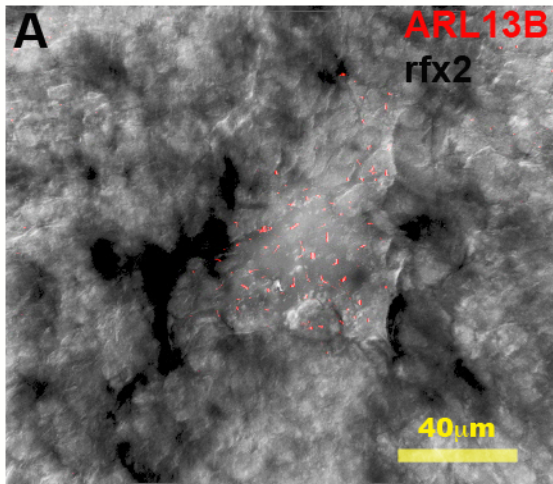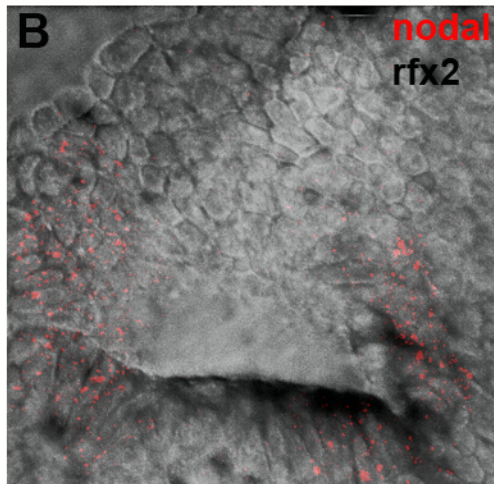

Supplemental Figure 2

**RFX3**

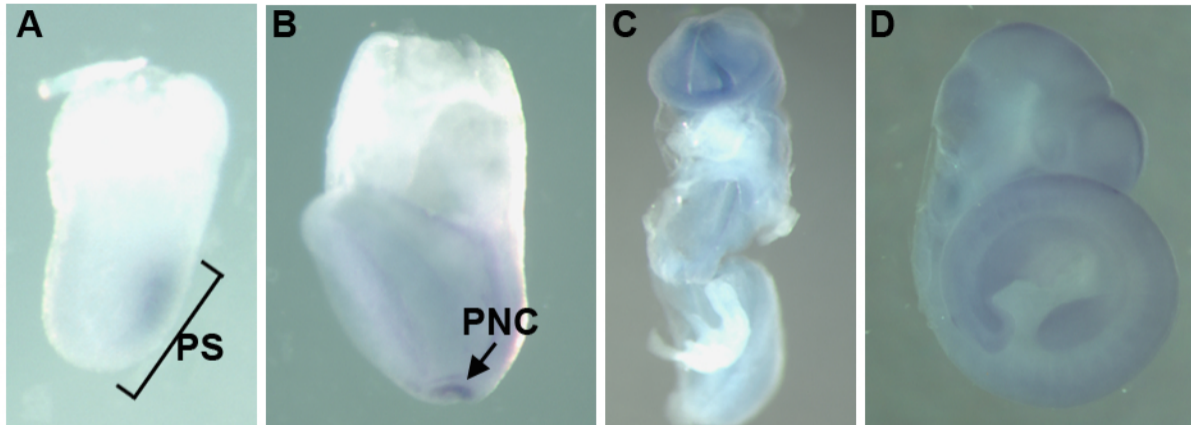

Supplemental Figure 3

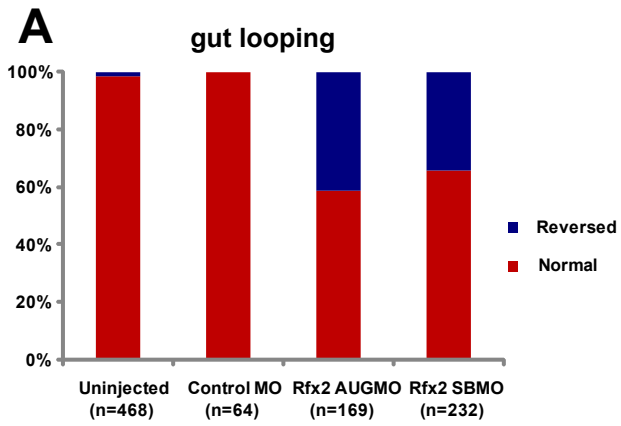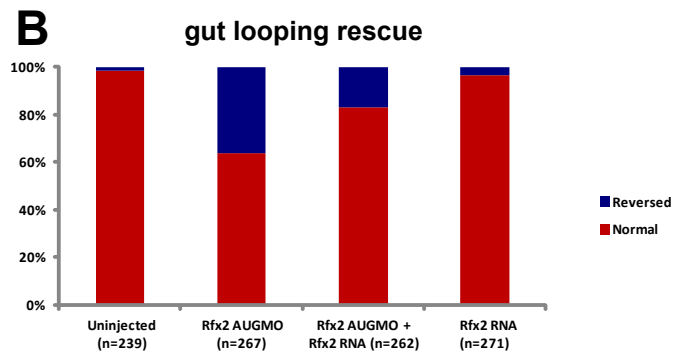

Supplemental Figure 4

Rfx2 [NM\_009056], adapted from ecr browser

Location: chr17:56915468-56970386

Strand: +

Genomic length: 54919 bps

Number of exons: 17

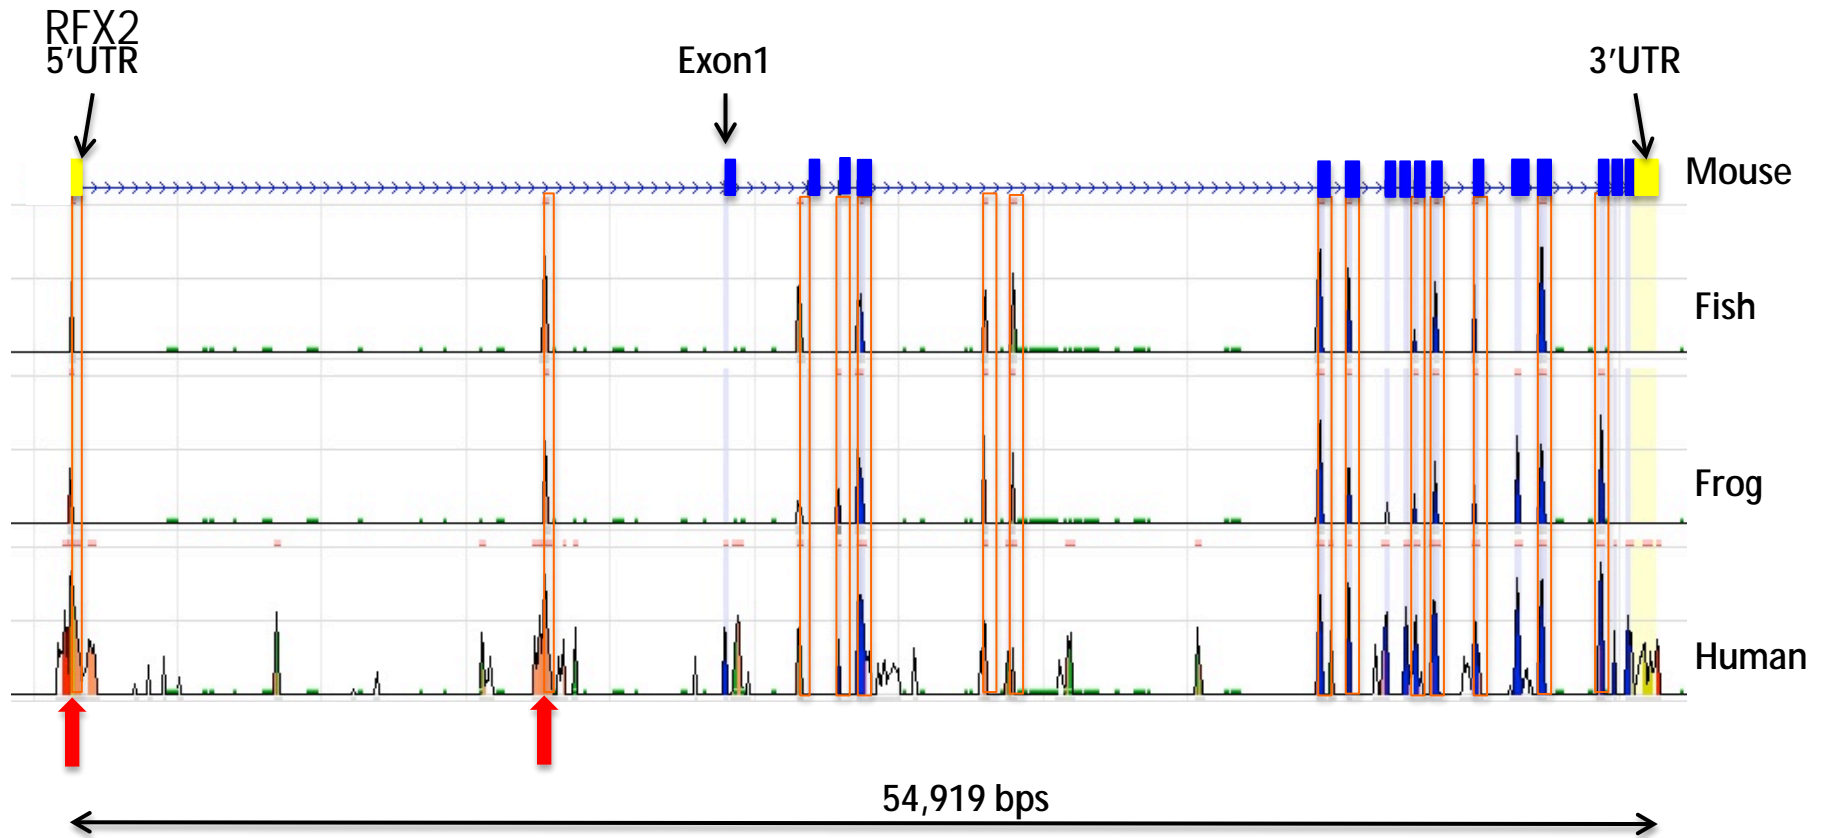

Supplemental Figure 5

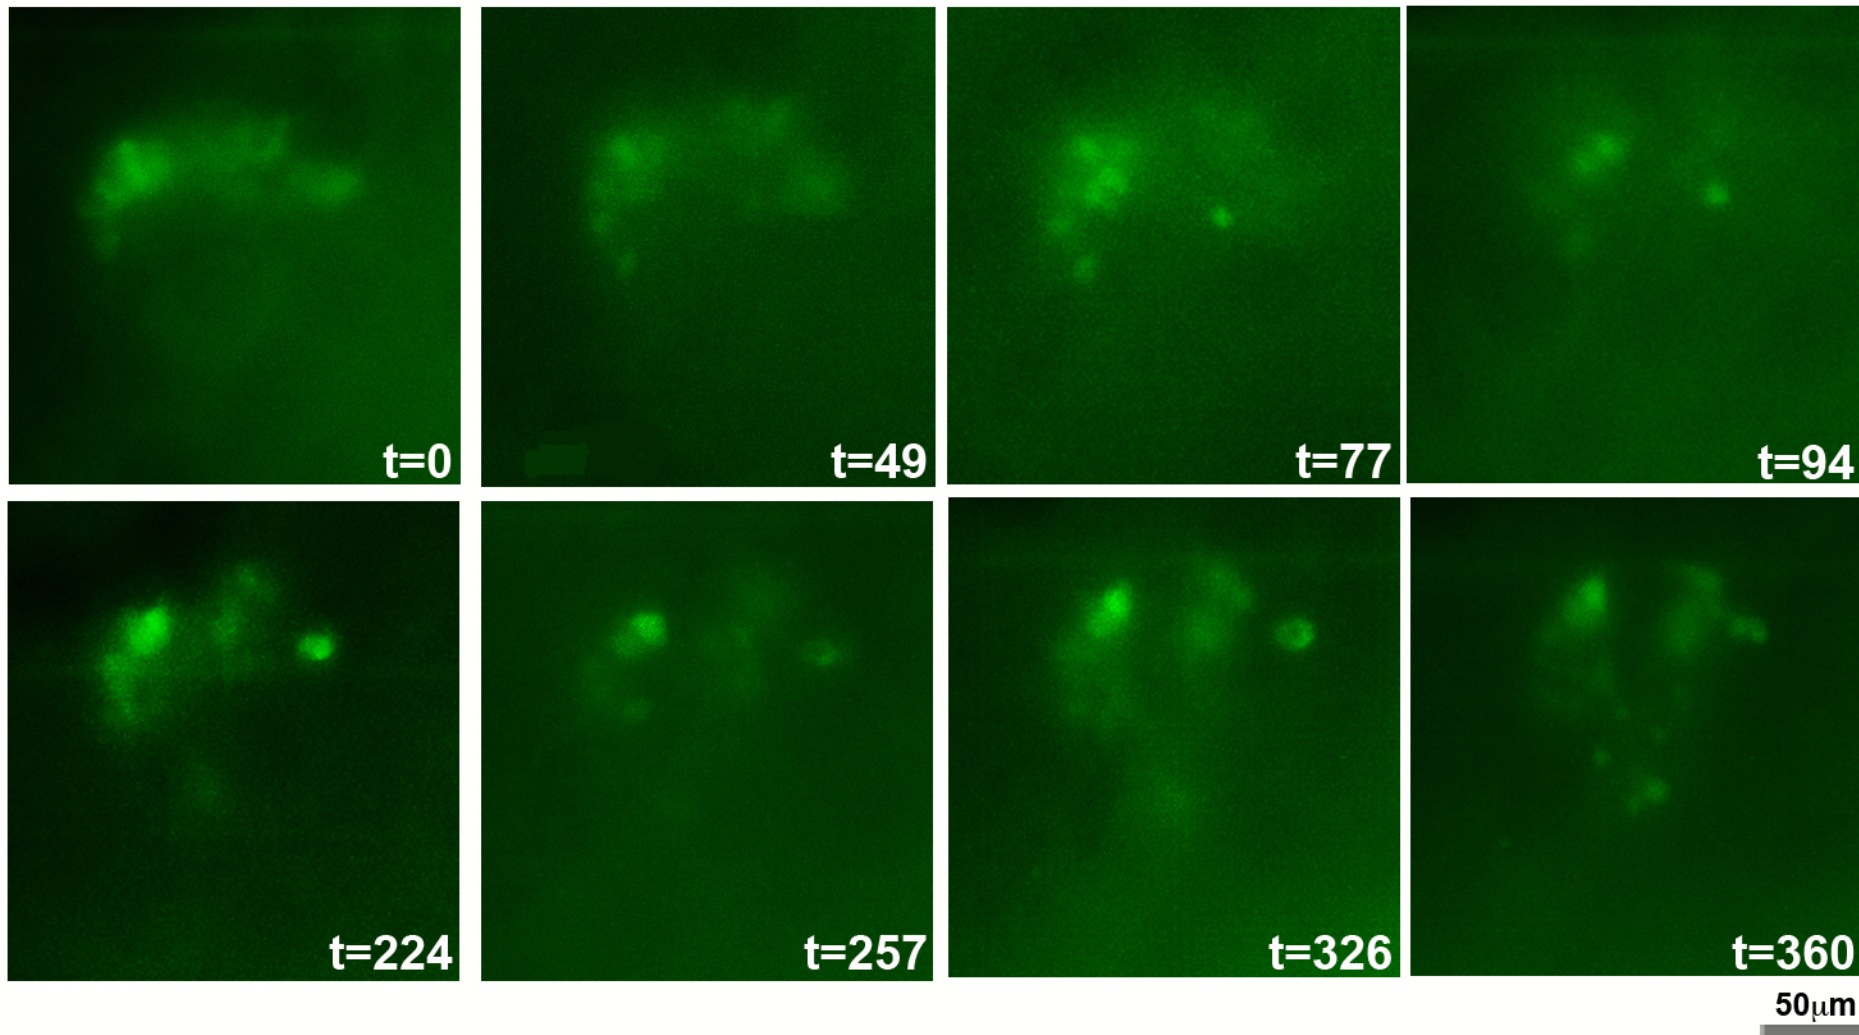

Supplemental Figure 6

**A**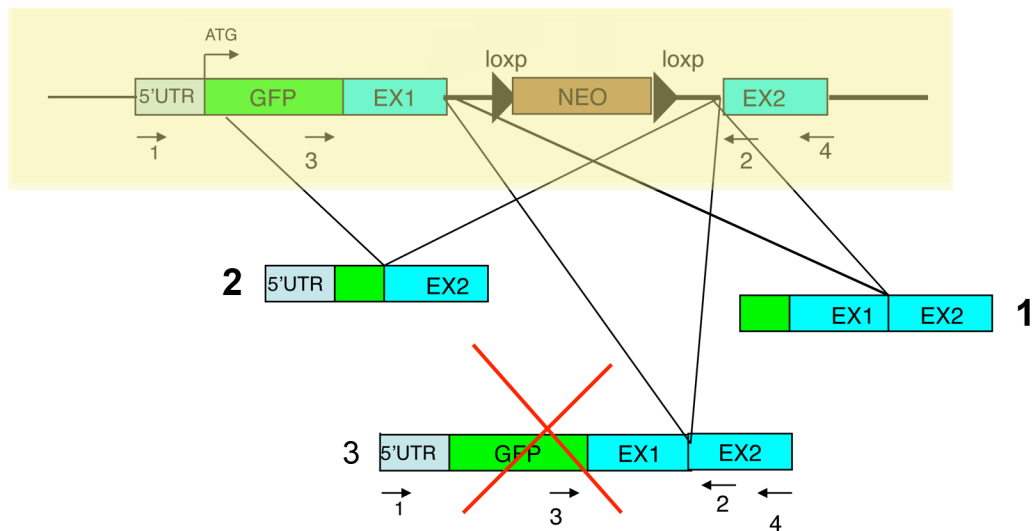**B**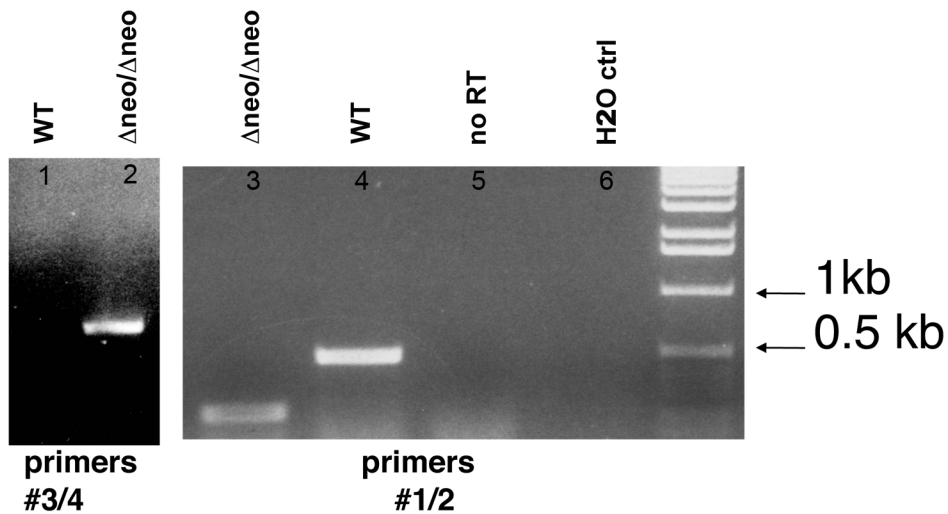

Supplemental Figure 7

posterior

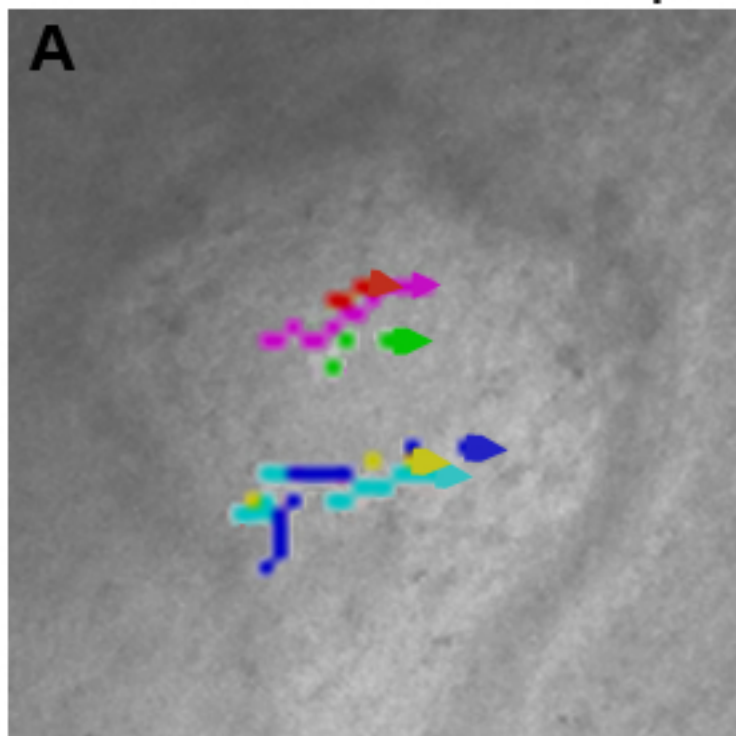

**IrdGFP**

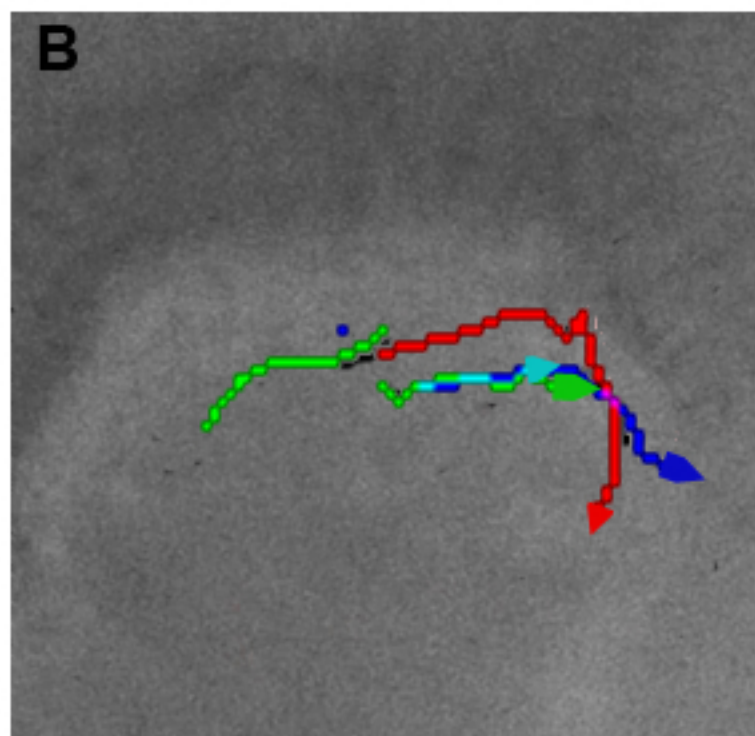

Left

**Ird $\Delta$ neo/ $\Delta$ neo :: RFX2Cre**
